# Supplementary material for: Macrophage targeting contributes to the inhibitory effects of embelin on colitis-associated cancer
Source: PubMed Central journal article supplement (PMC4991400; doi:10.18632/oncotarget.6969), 2016-01-21
Supplement: oncotarget-07-19548-s001.pdf [file oncotarget-07-19548-s001.pdf]

# Macrophage targeting contributes to the inhibitory effects of embelin on colitis-associated cancer

## Supplementary Materials

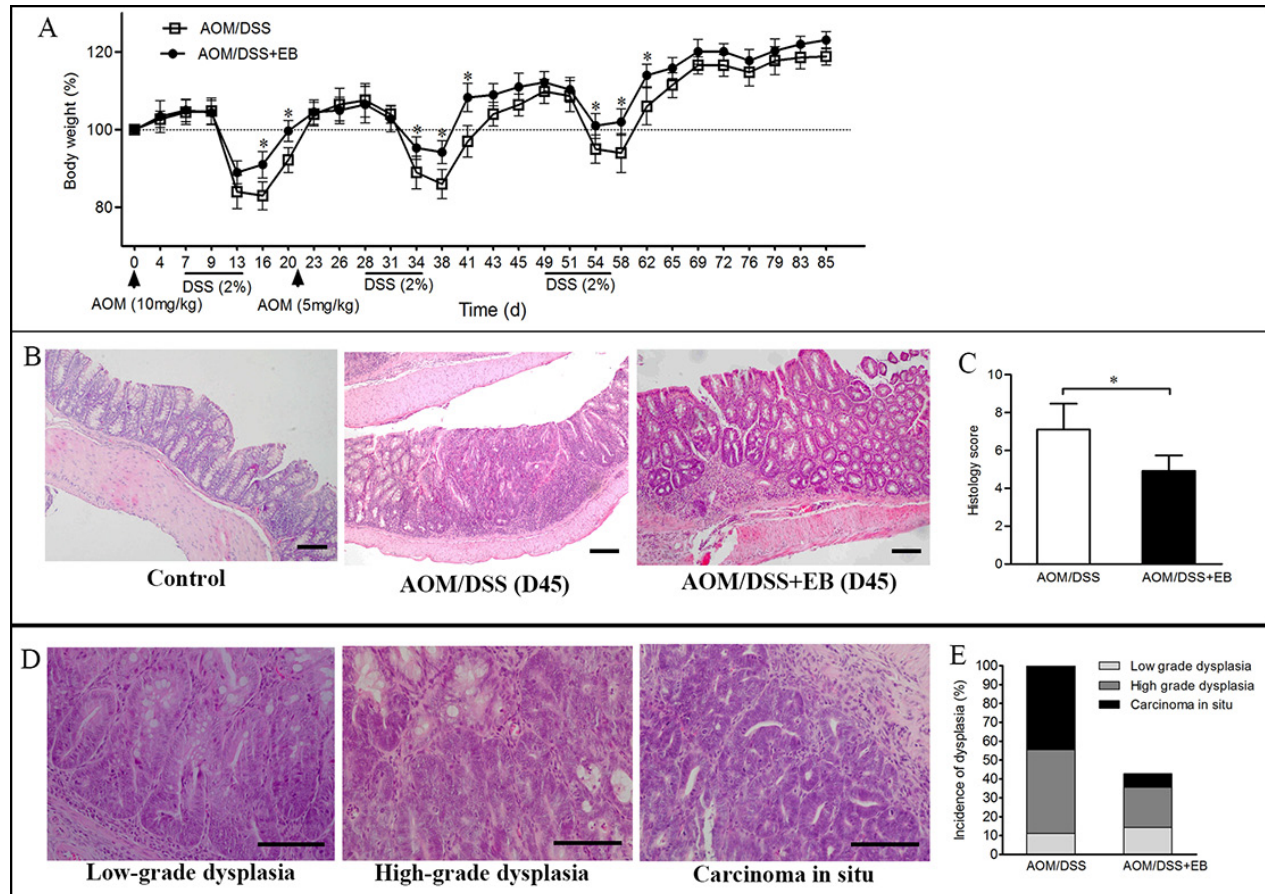

**Supplementary Figure S1: Embelin (EB) protected mice against colitis and colitis-associated dysplasia during the early stage of CAC.** (A) Body weight changes throughout the study. (B) Representative images of H & E staining of colon section at day 45 after AOM/DSS administration. Scale bar: 50  $\mu$ m. (C) Semiquantitative scoring of histopathology. (D) Representative high magnification images showing dysplasia in colon tissue at day 45 of CAC regimen. Scale bar: 50  $\mu$ m. (E) Overall grading of dysplasia in each group. Data are expressed as mean  $\pm$  SD ( $n = 10-14$ /group;  $*p < 0.05$ ).

**Supplementary Table S1: The sequences of primers used in qPCR assay**

| Genes                         | Sequences |                               |
|-------------------------------|-----------|-------------------------------|
| <i>Arginase1</i>              | Forward   | 5'-CTCCAAGCCAAAGTCCTTAGAG-3'  |
|                               | Reverse   | 5'-AGGAGCTGTCATTAGGGACATC-3'  |
| <i>Ccl2</i>                   | Forward   | 5'-TTAAAAACCTGGATCGGAACCAA-3' |
|                               | Reverse   | 5'-GCATTAGCTTCAGATTTACGGGT-3' |
| <i>Cox2</i>                   | Forward   | 5'-TGAGCAACTATTCCAAACCAGC-3'  |
|                               | Reverse   | 5'-GCACGTAGTCTTCGATCACTATC-3' |
| <i>Csf1</i>                   | Forward   | 5'-ATGAGCAGGAGTATTGCCAAGG-3'  |
|                               | Reverse   | 5'-TCCATTCCCAATCATGTGGCTA-3'  |
| <i>Cxcl10</i>                 | Forward   | 5'-CCAAGTGCTGCCGTCATTTTC-3'   |
|                               | Reverse   | 5'-GGCTCGCAGGGATGATTTCAA-3'   |
| <i>Gm-csf</i>                 | Forward   | 5'-GGCCTTGGAAGCATGTAGAGG-3'   |
|                               | Reverse   | 5'-GGAGAACTCGTTAGAGACGACTT-3' |
| <i>Ifn<math>\gamma</math></i> | Forward   | 5'-ATGAACGCTACACACTGCATC-3'   |
|                               | Reverse   | 5'-CCATCCTTTTGCCAGTTCTC-3'    |
| <i>Il-1<math>\beta</math></i> | Forward   | 5'-GCAACTGTTCTGAACTCAACT-3'   |
|                               | Reverse   | 5'-ATCTTTTGGGGTCCGTCAACT-3'   |
| <i>Il-4</i>                   | Forward   | 5'-GGTCTCAACCCCCAGCTAGT-3'    |
|                               | Reverse   | 5'-GCCGATGATCTCTCTCAAGTGAT-3' |
| <i>Il-6</i>                   | Forward   | 5'-TAGTCCTTCCTACCCCAATTTCC-3' |
|                               | Reverse   | 5'-TTGGTCCTTAGCCACTCCTTC-3'   |
| <i>Il-10</i>                  | Forward   | 5'-GCTCTTACTGACTGGCATGAG-3'   |
|                               | Reverse   | 5'-CGCAGCTCTAGGAGCATGTG-3'    |
| <i>Il-12</i>                  | Forward   | 5'-ACTCTGCGCCAGAAACCTC-3'     |
|                               | Reverse   | 5'-CACCTGTGTGATGGTCACGAC-3'   |
| <i>iNos</i>                   | Forward   | 5'-GTTCTCAGCCCAACAATACAAGA-3' |
|                               | Reverse   | 5'-GTGGACGGGTCGATGTCAC-3'     |
| <i>Mmp2</i>                   | Forward   | 5'-ACCTGAACACTTTCTATGGCTG-3'  |
|                               | Reverse   | 5'-CTTCCGCATGGTCTCGATG-3'     |
| <i>Mrc1</i>                   | Forward   | 5'-CTCTGTTCACTATTGGACGC-3'    |
|                               | Reverse   | 5'-CGGAATTTCTGGGATTCAGCTTC-3' |
| <i>Tnfa</i>                   | Forward   | 5'-CCCTCACACTCAGATCATCTTCT-3' |
|                               | Reverse   | 5'-GCTACGACGTGGGCTACAG-3'     |
| <i>Trem2</i>                  | Forward   | 5'-CTGGAACCGTCACCATCACTC-3'   |
|                               | Reverse   | 5'-CGAAACTCGATGACTCCTCGG-3'   |
| <i>Ym1</i>                    | Forward   | 5'-CAGGTCTGGCAATTCTTCTGAA-3'  |
|                               | Reverse   | 5'-GTCTTGCTCATGTGTGTAAGTGA-3' |
| <i>Gapdh</i>                  | Forward   | 5'-AGGTCGGTGTGAACGGATTTG-3'   |
|                               | Reverse   | 5'-TGTAGACCATGTAGTTGAGGTCA-3' |
